# Supplementary material for: Significance of m 6A Methyltransferase‑Related lncRNAs in the Prognosis and Immunotherapy of Hepatocellular Carcinoma
Source: Research Square preprint supplement (doi:10.21203/rs.3.rs-165071/v1), 2021-02-02
Supplement: Supplementary file 1 [file f1b44aeda4d14221622eec5b.xlsx]

## Sheet: GSEA
Terms and pathways related to immunity by Gene set enrichment analysis
ID	Description	setSize	enrichmentScore	NES	pvalue	p.adjust	qvalues	rank	leading_edge	core_enrichment	Category	geneSymbol
GO:0002520	immune system development	932	0.459677	1.30516	0.000999001	0.0220441	0.0183041	9544	tags=52%, list=33%, signal=36%	54997/6659/2539/6714/4192/2302/9133/7153/4318/2719/54443/7301/4609/2648/112616/578/8767/9833/5585/4830/302/23212/7040/6929/51176/28982/56603/6223/1945/3276/6194/3623/10537/2177/652/3976/54517/4831/4323/1028/1021/23210/8861/25946/6208/9156/23218/7057/168002/3930/5591/2049/581/5468/55646/4212/5613/632/171023/8324/641649/3720/4088/2056/182/7468/8563/55636/8761/54209/9991/7564/3965/4050/3148/29781/33…	GO_BP	TESC/SOX4/G6PD/SRC/MDK/FOXJ1/CCNB2/TOP2A/MMP9/GPC3/ANLN/TYRO3/MYC/KAT2A/CMTM7/BAK1/RIPK2/MELK/PKN1/NME1/ANXA2/RRS1/TGFB1/TCF3/LEF1/FLVCR1/CYP26B1/RPS19/EFNA4/PRMT1/RPS6/INHA/UBD/FANCD2/BMP4/LIF/PUS7/NME2/MMP14/CDKN1C/CDK6/JMJD6/LDB1/ZNF385A/RPS14/EXO1/NBEAL2/THBS1/DACT2/LBR/PRKDC/EPHB3/BAX/PPARG/LYAR/MEIS2/PRKX/BGLAP/ASXL1/FZD7/TMEM91/JARID2/SMAD3/EPO/JAG1/NSD2/THOC5/CHD7/PABPC4/TREM2/PTBP3/ZNF16…
GO:0002429	immune response-activating cell surface receptor signaling pathway	350	0.476718	1.3328	0.00201207	0.0346192	0.0287457	10136	tags=59%, list=35%, signal=39%	6714/27242/4582/3984/8767/6188/5580/123920/5621/3326/5747/71/80381/10095/79679/581/727897/5058/10603/7430/56940/865/3265/10616/2207/10197/147179/10552/10093/100/10163/64170/7917/11120/8398/8890/121665/25/644150/57181/784/4773/5335/10109/10094/29085/3118/2874/6850/5971/5879/5771/4641/2885/10454/27086/8945/5710/915/3120/55824/25865/5594/5595/10787/3320/10892/8893/5296/11314/55845/3551/3055/5717/577…	GO_BP	SRC/TNFRSF21/MUC1/LIMK1/RIPK2/RPS3/PRKCD/CMTM3/PRNP/HSP90AB1/PTK2/ACTG1/CD276/ARPC1B/VTCN1/BAX/MUC5B/PAK1/SH2B2/EZR/DUSP22/CBFB/HRAS/RBCK1/FCER1G/PSME3/WIPF2/ARPC1A/ARPC4/ADA/WASF2/CARD9/BAG6/BTN2A1/PLA2G6/EIF2B4/SPPL3/ABL1/WIPF3/SLC39A10/CACNB3/NFATC2/PLCG1/ARPC2/ARPC3/PHPT1/HLA-DQA2/GPS2/SYK/RELB/RAC1/PTPN2/MYO1C/GRB2/TAB1/FOXP1/BTRC/PSMD4/CD3D/HLA-DQB2/PAG1/PRKD2/MAPK1/MAPK3/NCKAP1/HSP90AA1/MA…
GO:0002768	immune response-regulating cell surface receptor signaling pathway	382	0.463069	1.29828	0.00301205	0.0472463	0.0392304	10136	tags=58%, list=35%, signal=38%	100133941/6714/27242/4582/3984/8767/6188/5580/123920/5621/3326/5747/71/80381/10095/79679/581/4214/727897/5058/10603/7430/56940/865/3265/10616/2207/10197/147179/10552/10093/100/10163/64170/7917/11120/8398/8890/121665/25/644150/57181/784/4773/5335/10109/10094/29085/3118/6464/2874/6850/5971/5879/5771/4641/2885/10454/27086/8945/5710/915/3120/5601/55824/25865/5594/5595/10787/3320/10892/8893/5296/11314…	GO_BP	CD24/SRC/TNFRSF21/MUC1/LIMK1/RIPK2/RPS3/PRKCD/CMTM3/PRNP/HSP90AB1/PTK2/ACTG1/CD276/ARPC1B/VTCN1/BAX/MAP3K1/MUC5B/PAK1/SH2B2/EZR/DUSP22/CBFB/HRAS/RBCK1/FCER1G/PSME3/WIPF2/ARPC1A/ARPC4/ADA/WASF2/CARD9/BAG6/BTN2A1/PLA2G6/EIF2B4/SPPL3/ABL1/WIPF3/SLC39A10/CACNB3/NFATC2/PLCG1/ARPC2/ARPC3/PHPT1/HLA-DQA2/SHC1/GPS2/SYK/RELB/RAC1/PTPN2/MYO1C/GRB2/TAB1/FOXP1/BTRC/PSMD4/CD3D/HLA-DQB2/MAPK9/PAG1/PRKD2/MAPK1/M…
GO:0002200	somatic diversification of immune receptors	67	0.597366	1.48086	0.00341686	0.0515968	0.0428428	5354	tags=49%, list=18%, signal=40%	7040/6929/51176/9156/5591/7468/3148/4436/9984/23529/27343/6932/9466/5387/51010/7037/10538/3329/7374/4683/55183/10721/2067/64421/9025/79915/7158/22976/6830/27434/8888/2956/472	GO_BP	TGFB1/TCF3/LEF1/EXO1/PRKDC/NSD2/HMGB2/MSH2/THOC1/CLCF1/POLL/TCF7/IL27RA/PMS2P3/EXOSC3/TFRC/BATF/HSPD1/UNG/NBN/RIF1/POLQ/ERCC1/DCLRE1C/RNF8/ATAD5/TP53BP1/PAXIP1/SUPT6H/POLM/MCM3AP/MSH6/ATM
GO:0002433	immune response-regulating cell surface receptor signaling pathway involved in phagocytosis	76	0.5691	1.43154	0.00678733	0.0704846	0.0585261	8854	tags=71%, list=30%, signal=50%	6714/3984/5580/3326/5747/71/10095/5058/147179/10552/10093/10163/8398/25/644150/5335/10109/10094/6850/5879/4641/2885/5594/5595/10787/3320/5296/55845/3055/10096/60/961/5338/10451/7409/7456/10006/63916/4067/10097/2889/2209/10092/64005/55198/3071/26060/998/51517/23191/2268/5906/7454/5291	GO_BP	SRC/LIMK1/PRKCD/HSP90AB1/PTK2/ACTG1/ARPC1B/PAK1/WIPF2/ARPC1A/ARPC4/WASF2/PLA2G6/ABL1/WIPF3/PLCG1/ARPC2/ARPC3/SYK/RAC1/MYO1C/GRB2/MAPK1/MAPK3/NCKAP1/HSP90AA1/PIK3R2/BRK1/HCK/ACTR3/ACTB/CD47/PLD2/VAV3/VAV1/WIPF1/ABI1/ELMO2/LYN/ACTR2/RAPGEF1/FCGR1A/ARPC5/MYO1G/APPL2/NCKAP1L/APPL1/CDC42/NCKIPSD/CYFIP1/FGR/RAP1A/WAS/PIK3CB
GO:0002455	humoral immune response mediated by circulating immunoglobulin	46	-0.778673	-2.27146	0.00680272	0.0704846	0.0585261	1097	tags=52%, list=4%, signal=50%	717/975/51279/733/727/721/1191/3426/725/718/1401/715/710/716/4153/325/730/722/732/731/10747/729/3263/735	GO_BP	C2/CD81/C1RL/C8G/C5/C4B/CLU/CFI/C4BPB/C3/CRP/C1R/SERPING1/C1S/MBL2/APCS/C7/C4BPA/C8B/C8A/MASP2/C6/HPX/C9
GO:0002920	regulation of humoral immune response	72	-0.762651	-2.4133	0.00934579	0.0832734	0.0691451	1472	tags=47%, list=5%, signal=45%	922/2213/10563/717/975/1369/5627/733/727/721/1191/3426/629/725/7448/718/715/710/716/3075/3078/2147/1361/730/3080/1370/722/732/731/729/3263/10877/81494/735	GO_BP	CD5L/FCGR2B/CXCL13/C2/CD81/CPN1/PROS1/C8G/C5/C4B/CLU/CFI/CFB/C4BPB/VTN/C3/C1R/SERPING1/C1S/CFH/CFHR1/F2/CPB2/C7/CFHR2/CPN2/C4BPA/C8B/C8A/C6/HPX/CFHR4/CFHR5/C9
GO:0002562	somatic diversification of immune receptors via germline recombination within a single locus	59	0.594175	1.45863	0.0103093	0.0868074	0.0720795	7006	tags=54%, list=24%, signal=41%	7040/6929/51176/9156/5591/7468/3148/4436/9984/23529/6932/9466/51010/7037/10538/3329/7374/4683/55183/2067/64421/9025/79915/7158/22976/6830/2956/472/604/7518/118460/23075	GO_BP	TGFB1/TCF3/LEF1/EXO1/PRKDC/NSD2/HMGB2/MSH2/THOC1/CLCF1/TCF7/IL27RA/EXOSC3/TFRC/BATF/HSPD1/UNG/NBN/RIF1/ERCC1/DCLRE1C/RNF8/ATAD5/TP53BP1/PAXIP1/SUPT6H/MSH6/ATM/BCL6/XRCC4/EXOSC6/SWAP70
GO:0016064	immunoglobulin mediated immune response	111	-0.500166	-1.68145	0.0125	0.0986354	0.0819007	1097	tags=23%, list=4%, signal=23%	717/975/958/50943/51279/733/727/721/1191/3426/725/718/1401/715/710/716/4153/325/730/722/732/731/10747/729/3263/735	GO_BP	C2/CD81/CD40/FOXP3/C1RL/C8G/C5/C4B/CLU/CFI/C4BPB/C3/CRP/C1R/SERPING1/C1S/MBL2/APCS/C7/C4BPA/C8B/C8A/MASP2/C6/HPX/C9
GO:0002220	innate immune response activating cell surface receptor signaling pathway	112	0.515775	1.34665	0.0151679	0.111267	0.092389	10479	tags=61%, list=36%, signal=39%	6714/4582/5580/727897/5058/3265/2207/10197/64170/6850/5971/10454/8945/5710/10892/3551/5717/5705/5691/4893/6885/10213/84433/5682/5693/5685/5709/5719/5692/4067/2033/5707/5704/9491/3845/5062/6500/2867/23291/8915/5970/5689/4588/23198/5708/5714/5716/5694/200958/1147/5686/50856/257397/5711/5718/30835/5715/9861/4584/8454/4790/5690/5701/5688/5695/5170/5706/5713	GO_BP	SRC/MUC1/PRKCD/MUC5B/PAK1/HRAS/FCER1G/PSME3/CARD9/SYK/RELB/TAB1/BTRC/PSMD4/MALT1/IKBKB/PSMD11/PSMC5/PSMB3/NRAS/MAP3K7/PSMD14/CARD11/PSMA1/PSMB5/PSMA4/PSMD3/PSMD13/PSMB4/LYN/EP300/PSMD1/PSMC4/PSMF1/KRAS/PAK2/SKP1/FFAR2/FBXW11/BCL10/RELA/PSMB1/MUC6/PSME4/PSMD2/PSMD8/PSMD10/PSMB6/MUC20/CHUK/PSMA5/CLEC4A/TAB3/PSMD5/PSMD12/CD209/PSMD9/PSMD6/MUC3A/CUL1/NFKB1/PSMB2/PSMC2/PSMA7/PSMB7/PDPK1/PSMC6/PSMD7
GO:0002757	immune response-activating signal transduction	515	0.425997	1.20236	0.018	0.121729	0.101076	10136	tags=57%, list=35%, signal=38%	6714/27242/1535/57402/7301/6271/4582/55765/3984/8767/6188/5580/9641/6233/123920/5621/3326/5802/5747/71/80381/10095/79679/85364/581/4214/9684/727897/5058/3304/10603/7430/6280/56940/865/10211/3265/10616/2207/29997/10197/57162/7321/147179/10552/10093/100/10163/64170/7917/11120/8398/8890/121665/79155/7311/25/644150/4795/57181/784/4773/5335/1755/10109/409/10094/81622/708/29085/3118/3329/2874/6850/3656…	GO_BP	SRC/TNFRSF21/CYBA/S100A14/TYRO3/S100A1/MUC1/INAVA/LIMK1/RIPK2/RPS3/PRKCD/IKBKE/RPS27A/CMTM3/PRNP/HSP90AB1/PTPRS/PTK2/ACTG1/CD276/ARPC1B/VTCN1/ZCCHC3/BAX/MAP3K1/LRRC14/MUC5B/PAK1/HSPA1B/SH2B2/EZR/S100A9/DUSP22/CBFB/FLOT1/HRAS/RBCK1/FCER1G/NOP53/PSME3/PELI1/UBE2D1/WIPF2/ARPC1A/ARPC4/ADA/WASF2/CARD9/BAG6/BTN2A1/PLA2G6/EIF2B4/SPPL3/TNIP2/UBA52/ABL1/WIPF3/NFKBIL1/SLC39A10/CACNB3/NFATC2/PLCG1/DMBT1/ARP…
GO:0002764	immune response-regulating signaling pathway	548	0.419368	1.18625	0.01998	0.12972	0.107711	10136	tags=57%, list=35%, signal=38%	100133941/6714/27242/1535/57402/7301/6271/4582/55765/3984/8767/6188/5580/9641/6233/123920/5621/3326/5802/5747/71/80381/10095/79679/85364/581/4214/9684/727897/5058/3304/10603/7430/6280/56940/865/10211/3265/10616/2207/29997/10197/57162/7321/147179/10552/10093/100/10163/64170/7917/11120/8398/8890/121665/79155/7311/25/644150/4795/57181/784/4773/5335/1755/10109/409/10094/81622/708/29085/3118/3329/6464…	GO_BP	CD24/SRC/TNFRSF21/CYBA/S100A14/TYRO3/S100A1/MUC1/INAVA/LIMK1/RIPK2/RPS3/PRKCD/IKBKE/RPS27A/CMTM3/PRNP/HSP90AB1/PTPRS/PTK2/ACTG1/CD276/ARPC1B/VTCN1/ZCCHC3/BAX/MAP3K1/LRRC14/MUC5B/PAK1/HSPA1B/SH2B2/EZR/S100A9/DUSP22/CBFB/FLOT1/HRAS/RBCK1/FCER1G/NOP53/PSME3/PELI1/UBE2D1/WIPF2/ARPC1A/ARPC4/ADA/WASF2/CARD9/BAG6/BTN2A1/PLA2G6/EIF2B4/SPPL3/TNIP2/UBA52/ABL1/WIPF3/NFKBIL1/SLC39A10/CACNB3/NFATC2/PLCG1/DMBT…
GO:0002323	natural killer cell activation involved in immune response	32	-0.560546	-1.53964	0.0231214	0.14043	0.116604	2146	tags=12%, list=7%, signal=12%	3916/6845/3134/114770	GO_BP	LAMP1/VAMP7/HLA-F/PGLYRP2
GO:0002204	somatic recombination of immunoglobulin genes involved in immune response	44	0.594663	1.39706	0.0233918	0.141652	0.117619	7006	tags=55%, list=24%, signal=41%	7040/9156/7468/4436/9984/23529/9466/51010/7037/10538/3329/7374/4683/55183/2067/9025/79915/7158/22976/6830/2956/604/118460/23075	GO_BP	TGFB1/EXO1/NSD2/MSH2/THOC1/CLCF1/IL27RA/EXOSC3/TFRC/BATF/HSPD1/UNG/NBN/RIF1/ERCC1/RNF8/ATAD5/TP53BP1/PAXIP1/SUPT6H/MSH6/BCL6/EXOSC6/SWAP70
GO:0002208	somatic diversification of immunoglobulins involved in immune response	44	0.594663	1.39706	0.0233918	0.141652	0.117619	7006	tags=55%, list=24%, signal=41%	7040/9156/7468/4436/9984/23529/9466/51010/7037/10538/3329/7374/4683/55183/2067/9025/79915/7158/22976/6830/2956/604/118460/23075	GO_BP	TGFB1/EXO1/NSD2/MSH2/THOC1/CLCF1/IL27RA/EXOSC3/TFRC/BATF/HSPD1/UNG/NBN/RIF1/ERCC1/RNF8/ATAD5/TP53BP1/PAXIP1/SUPT6H/MSH6/BCL6/EXOSC6/SWAP70
GO:0002325	natural killer cell differentiation involved in immune response	5	-0.92115	-1.56793	0.0285714	0.163485	0.135748	111	tags=40%, list=0%, signal=40%	8993/114770	GO_BP	PGLYRP1/PGLYRP2
GO:0032826	regulation of natural killer cell differentiation involved in immune response	5	-0.92115	-1.56793	0.0285714	0.163485	0.135748	111	tags=40%, list=0%, signal=40%	8993/114770	GO_BP	PGLYRP1/PGLYRP2
GO:0002460	adaptive immune response based on somatic recombination of immune receptors built from immunoglobulin superfamily domains	249	-0.379153	-1.41628	0.0454545	0.22056	0.183139	1438	tags=18%, list=5%, signal=18%	2213/3107/10384/23180/3134/8809/10563/634/7133/90865/717/6095/3106/3570/975/958/50943/339390/3142/51279/733/727/721/6363/1191/912/3426/725/6097/718/1401/715/710/716/246778/4153/325/730/722/732/731/10747/729/383/3263/735	GO_BP	FCGR2B/HLA-C/BTN3A3/RFTN1/HLA-F/IL18R1/CXCL13/CEACAM1/TNFRSF1B/IL33/C2/RORA/HLA-B/IL6R/CD81/CD40/FOXP3/CLEC4G/HLX/C1RL/C8G/C5/C4B/CCL19/CLU/CD1D/CFI/C4BPB/RORC/C3/CRP/C1R/SERPING1/C1S/IL27/MBL2/APCS/C7/C4BPA/C8B/C8A/MASP2/C6/ARG1/HPX/C9
GO:0006959	humoral immune response	242	-0.554176	-2.05039	0.047619	0.227519	0.188918	1097	tags=21%, list=4%, signal=21%	717/85569/975/1369/3627/10584/5627/2220/51279/5919/733/727/721/1191/6480/2920/3426/629/5648/725/7448/8547/116842/718/1401/715/710/716/3075/3078/2147/1361/6590/4153/325/730/3080/2243/1370/722/2244/732/114770/731/10747/729/5320/3263/10877/81494/735/3273	GO_BP	C2/GALP/CD81/CPN1/CXCL10/COLEC10/PROS1/FCN2/C1RL/RARRES2/C8G/C5/C4B/CLU/ST6GAL1/CXCL2/CFI/CFB/MASP1/C4BPB/VTN/FCN3/LEAP2/C3/CRP/C1R/SERPING1/C1S/CFH/CFHR1/F2/CPB2/SLPI/MBL2/APCS/C7/CFHR2/FGA/CPN2/C4BPA/FGB/C8B/PGLYRP2/C8A/MASP2/C6/PLA2G2A/HPX/CFHR4/CFHR5/C9/HRG
R-HSA-1280218	Adaptive Immune System	742	0.458328	1.29524	0.000999001	0.0114013	0.00754727	10727	tags=62%, list=37%, signal=40%	6714/991/11065/131405/10112/642/11004/10053/1535/1759/5909/7534/9493/29127/8767/1515/3832/24137/6233/3710/1280/7408/27338/65264/10293/4794/26118/92912/81559/23108/135892/899/81930/1075/9520/54620/154881/3797/51665/10382/6921/57761/29116/54209/1211/6502/55740/51434/10376/163/5058/63893/5518/5478/3265/1062/10616/2280/147700/4688/64837/1510/10197/120425/7324/9040/64750/7321/3693/8655/80228/3799/5699…	Reactome	SRC/CDC20/UBE2C/TRIM71/KIF20A/BLMH/KIF2C/AP1M2/CYBA/DNM1/RAP1GAP/YWHAZ/KIF23/RACGAP1/RIPK2/CTSV/KIF11/KIF4A/RPS27A/ITPR3/COL2A1/VASP/UBE2S/UBE2Z/TRAIP/NFKBIE/WSB1/UBE2Q2/TRIM11/RAP1GAP2/TRIM50/CCNF/KIF18A/CTSC/NPEPPS/FBXL19/KCTD7/KIF3C/ASB1/TUBB4A/ELOC/TRIB3/MYLIP/TREM2/CLTA/SKP2/ENAH/ANAPC7/TUBA1B/AP2B1/PAK1/UBE2O/PPP2R1A/PPIA/HRAS/CENPE/RBCK1/FKBP1A/KLC3/NCF2/KLC2/CTSE/PSME3/JAML/UBE2E1/UBE2M/S…
